# Supplementary material for: Experimental Treatment with Edaravone in a Mouse Model of Spinocerebellar Ataxia 1
Source: MDPI journal article supplement (doi:10.3390/ijms241310689), 2023-06-26
Supplement: s1 [file s1]

## Supplementary material S1

### Experimental treatment with edaravone in a mouse model of spinocerebellar ataxia 1

Martina Sucha, Simona Benediktova, Filip Tichanek, Jan Jedlicka, Stepan Kapl, Dana Jelinkova, Zdenka Purkartova, Jan Tuma, Jitka Kuncova, Jan Cendelin

### List of gait parameters measured using CatWalk and their correlations with individual principal components

| Parameter                     | PC1_cor | PC2_cor | PC3_cor |
|-------------------------------|---------|---------|---------|
| Run_Average_Speed_.cm.s._SD   | 0.27    | 0.61    | 0.36    |
| RF_Stand_.s._SD               | -0.66   | 0.65    | 0.11    |
| RF_Swing_.s._SD               | -0.50   | 0.53    | 0.44    |
| RF_SwingSpeed_.cm.s._SD       | 0.23    | 0.89    | 0.19    |
| RF_StrideLength_.cm._SD       | -0.16   | 0.82    | 0.28    |
| RH_Stand_.s._SD               | -0.55   | 0.66    | 0.00    |
| RH_Swing_.s._SD               | -0.52   | 0.62    | 0.26    |
| RH_SwingSpeed_.cm.s._SD       | 0.24    | 0.86    | 0.22    |
| RH_StrideLength_.cm._SD       | -0.19   | 0.79    | 0.33    |
| LF_Stand_.s._SD               | -0.63   | 0.65    | 0.09    |
| LF_Swing_.s._SD               | -0.42   | 0.51    | 0.55    |
| LF_SwingSpeed_.cm.s._SD       | 0.16    | 0.90    | 0.11    |
| LF_StrideLength_.cm._SD       | -0.21   | 0.80    | 0.32    |
| LH_Stand_.s._SD               | -0.66   | 0.65    | -0.05   |
| LH_Swing_.s._SD               | -0.33   | 0.61    | 0.45    |
| LH_SwingSpeed_.cm.s._SD       | 0.25    | 0.84    | 0.01    |
| LH_StrideLength_.cm._SD       | -0.07   | 0.76    | 0.42    |
| Run_Average_Speed_.cm.s._Mean | 0.90    | 0.34    | 0.11    |
| RF_Stand_.s._Mean             | -0.91   | -0.19   | 0.06    |
| RF_Swing_.s._Mean             | -0.52   | -0.64   | 0.50    |
| RF_SwingSpeed_.cm.s._Mean     | 0.77    | 0.54    | -0.13   |
| RF_StrideLength_.cm._Mean     | 0.77    | -0.22   | 0.40    |
| RH_Stand_.s._Mean             | -0.79   | -0.11   | -0.07   |
| RH_Swing_.s._Mean             | -0.62   | -0.48   | 0.44    |
| RH_SwingSpeed_.cm.s._Mean     | 0.81    | 0.46    | -0.11   |
| RH_StrideLength_.cm._Mean     | 0.76    | -0.20   | 0.39    |
| LF_Stand_.s._Mean             | -0.92   | -0.18   | 0.02    |
| LF_Swing_.s._Mean             | -0.44   | -0.65   | 0.53    |
| LF_SwingSpeed_.cm.s._Mean     | 0.75    | 0.56    | -0.21   |
| LF_StrideLength_.cm._Mean     | 0.77    | -0.23   | 0.39    |
| LH_Stand_.s._Mean             | -0.84   | -0.06   | -0.13   |

|                                    |       |       |       |
|------------------------------------|-------|-------|-------|
| LH_Swing_.s._Mean                  | -0.53 | -0.51 | 0.51  |
| LH_SwingSpeed_.cm.s._Mean          | 0.78  | 0.48  | -0.23 |
| LH_StrideLength_.cm._Mean          | 0.75  | -0.18 | 0.41  |
| StepSequence_CA_...                | 0.10  | -0.13 | 0.21  |
| StepSequence_CB_...                | 0.34  | -0.11 | 0.36  |
| StepSequence_AA_...                | 0.21  | -0.29 | 0.48  |
| StepSequence_AB_...                | -0.36 | 0.27  | -0.54 |
| Support_Zero_...                   | 0.28  | 0.01  | 0.60  |
| Support_Single_...                 | 0.24  | -0.25 | 0.76  |
| Support_Diagonal_...               | 0.42  | -0.51 | -0.27 |
| Support_Girdle_...                 | -0.29 | 0.19  | -0.11 |
| Support_Lateral_...                | 0.08  | 0.11  | 0.44  |
| Support_Three_...                  | -0.52 | 0.49  | -0.58 |
| Support_Four_...                   | -0.49 | 0.54  | -0.38 |
| BOS_FrontPaws_Mean_.cm.            | -0.05 | 0.09  | -0.07 |
| BOS_HindPaws_Mean_.cm.             | -0.10 | -0.50 | 0.19  |
| PrintPositions_RightPaws_Mean_.cm. | -0.68 | -0.22 | 0.17  |
| PrintPositions_LeftPaws_Mean_.cm.  | -0.65 | -0.23 | 0.18  |

## Supplementary material S2

### Experimental treatment with edaravone in a mouse model of spinocerebellar ataxia 1

Martina Sucha, Simona Benediktova, Filip Tichanek, Jan Jedlicka, Stepan Kapl, Dana Jelinkova, Zdenka Purkartova, Jan Tuma, Jitka Kuncova, Jan Cendelin

### Median values of individual gait parameters measured using CatWalk

Presented as median (quartile 1, quartile 3)

N...number of mice

p-value...statistical significance level of the effect of experimental group estimated by the Kruskal-Wallis rank sum test

q-value...p-value adjusted using False discovery rate correction for multiple testing

Experimental groups:

- WT\_0...saline-treated wild type mice
- WT\_E...edaravone-treated wild type mice
- SCA1\_0...saline-treated SCA1 mice
- SCA1\_E...edaravone-treated SCA1 mice

| parameter                   | WT_0, N = 20         | WT_E, N = 20         | SCA1_0, N = 20       | SCA1_E, N = 20       | p-value | q-value |
|-----------------------------|----------------------|----------------------|----------------------|----------------------|---------|---------|
| Run_Average_Speed_.cm.s._SD | 7.4 (3.7, 10.9)      | 8.0 (4.6, 10.2)      | 4.9 (2.6, 7.4)       | 5.8 (4.4, 8.0)       | 0.4     | 0.5     |
| RF_Stand_.s._SD             | 0.036 (0.027, 0.045) | 0.042 (0.027, 0.047) | 0.044 (0.034, 0.061) | 0.037 (0.032, 0.052) | 0.3     | 0.4     |
| RF_Swing_.s._SD             | 0.026 (0.018, 0.033) | 0.028 (0.024, 0.036) | 0.028 (0.022, 0.035) | 0.026 (0.021, 0.030) | 0.8     | 0.8     |
| RF_SwingSpeed_.cm.s._SD     | 16 (8, 22)           | 18 (12,29)           | 20 (16,23)           | 22 (18, 28)          | 0.13    | 0.2     |
| RF_StrideLength_.cm._SD     | 0.76 (0.61, 1.09)    | 0.87 (0.65, 1.14)    | 0.88 (0.60, 1.37)    | 0.99 (0.76, 1.18)    | 0.7     | 0.8     |
| RH_Stand_.s._SD             | 0.04 (0.03, 0.04)    | 0.04 (0.03, 0.05)    | 0.04 (0.03, 0.07)    | 0.03 (0.03, 0.06)    | 0.3     | 0.4     |
| RH_Swing_.s._SD             | 0.029 (0.025, 0.042) | 0.036 (0.026, 0.043) | 0.042 (0.028, 0.054) | 0.039 (0.025, 0.059) | 0.4     | 0.5     |
| RH_SwingSpeed_.cm.s._SD     | 13 (7, 18)           | 14 (10, 21)          | 14 (14, 18)          | 16 (11, 20)          | 0.6     | 0.7     |
| RH_StrideLength_.cm._SD     | 0.80 (0.68, 1.19)    | 1.02 (0.75, 1.11)    | 0.94 (0.71, 1.31)    | 1.00 (0.75, 1.32)    | 0.6     | 0.7     |
| LF_Stand_.s._SD             | 0.03 (0.02, 0.05)    | 0.04 (0.03, 0.05)    | 0.04 (0.03, 0.07)    | 0.04 (0.03, 0.06)    | 0.3     | 0.4     |

|                               |                      |                      |                      |                      |       |       |
|-------------------------------|----------------------|----------------------|----------------------|----------------------|-------|-------|
| LF_Swing_.s._SD               | 0.025 (0.019, 0.036) | 0.029 (0.022, 0.033) | 0.027 (0.022, 0.034) | 0.025 (0.021, 0.032) | 0.9   | 0.9   |
| LF_SwingSpeed_.cm.s._SD       | 17 (8, 23)           | 20 (14, 25)          | 21 (16, 24)          | 24 (16, 28)          | 0.2   | 0.3   |
| LF_StrideLength_.cm._SD       | 0.73 (0.61, 1.14)    | 0.86 (0.73, 1.14)    | 0.86 (0.67, 1.27)    | 1.01 (0.71, 1.29)    | 0.6   | 0.7   |
| LH_Stand_.s._SD               | 0.032 (0.026, 0.042) | 0.039 (0.026, 0.046) | 0.038 (0.032, 0.072) | 0.040 (0.033, 0.063) | 0.2   | 0.3   |
| LH_Swing_.s._SD               | 0.028 (0.024, 0.046) | 0.032 (0.026, 0.045) | 0.038 (0.029, 0.050) | 0.036 (0.028, 0.052) | 0.4   | 0.5   |
| LH_SwingSpeed_.cm.s._SD       | 13 (7, 17)           | 13, (10, 16)         | 14 (10, 18)          | 18 (11, 22)          | 0.2   | 0.4   |
| LH_StrideLength_.cm._SD       | 0.90 (0.70, 1.19)    | 0.88 (0.71, 1.23)    | 0.96 (0.65, 1.25)    | 1.10 (0.72, 1.29)    | 0.8   | 0.9   |
| Run_Average_Speed_.cm.s._Mean | 26 (23, 28)          | 28 (22, 31)          | 23 (18, 27)          | 27 (23, 32)          | 0.11  | 0.2   |
| RF_Stand_.s._Mean             | 0.15 (0.14, 0.16)    | 0.14 (0.13, 0.15)    | 0.14 (0.13, 0.15)    | 0.15 (0.12, 0.16)    | 0.048 | 0.12  |
| RF_Swing_.s._Mean             | 0.128 (0.118, 0.138) | 0.114 (0.109, 0.131) | 0.112 (0.094, 0.139) | 0.093 (0.082, 0.123) | 0.006 | 0.04  |
| RF_SwingSpeed_.cm.s._Mean     | 55 (51, 62)          | 65 (55, 71)          | 59 (48, 73)          | 70 (59, 82)          | 0.04  | 0.12  |
| RF_StrideLength_.cm._Mean     | 6.67 (6.34, 7.02)    | 6.95 (6.31, 7.30)    | 6.31 (5.91, 6.62)    | 6.35 (6.18, 6.75)    | 0.017 | 0.074 |
| RH_Stand_.s._Mean             | 0.119 (0.108, 0.126) | 0.112 (0.103, 0.120) | 0.129 (0.111, 0.160) | 0.108 (0.086, 0.118) | 0.048 | 0.12  |
| RH_Swing_.s._Mean             | 0.16 (0.15, 0.18)    | 0.15 (0.13, 0.17)    | 0.15 (0.14, 0.19)    | 0.14 (0.11, 0.18)    | 0.4   | 0.5   |
| RH_SwingSpeed_.cm.s._Mean     | 44 (40, 51)          | 51 (43, 58)          | 43 (34, 52)          | 51 (40, 62)          | 0.3   | 0.4   |
| RH_StrideLength_.cm._Mean     | 6.63 (6.25, 7.01)    | 6.92 (6.32, 7.38)    | 6.31 (5.96, 6.59)    | 6.37 (6.14, 6.90)    | 0.022 | 0.091 |
| LF_Stand_.s._Mean             | 0.15 (0.13, 0.16)    | 0.14 (0.13, 0.15)    | 0.17 (0.14, 0.19)    | 0.15 (0.12, 0.16)    | 0.066 | 0.14  |
| LF_Swing_.s._Mean             | 0.127 (0.118, 0.141) | 0.118 (0.109, 0.128) | 0.106 (0.092, 0.142) | 0.099 (0.084, 0.117) | 0.003 | 0.025 |
| LF_SwingSpeed_.cm.s._Mean     | 55 (51, 64)          | 65 (53, 70)          | 59 (47, 71)          | 70 (61, 85)          | 0.04  | 0.12  |
| LF_StrideLength_.cm._Mean     | 6.65 (6.25, 7.07)    | 6.88 (6.38, 7.34)    | 6.33 (5.91, 6.58)    | 6.37 (6.14, 6.77)    | 0.012 | 0.06  |
| LH_Stand_.s._Mean             | 0.120 (0.107, 0.138) | 0.113 (0.095, 0.122) | 0.125 (0.110, 0.149) | 0.106 (0.094, 0.120) | 0.061 | 0.14  |
| LH_Swing_.s._Mean             | 0.15 (0.15, 0.18)    | 0.15 (0.14, 0.17)    | 0.14 (0.13, 0.19)    | 0.14 (0.11, 0.16)    | 0.3   | 0.4   |

|                                    |                   |                   |                   |                   |        |        |
|------------------------------------|-------------------|-------------------|-------------------|-------------------|--------|--------|
| LH_SwingSpeed_.cm.s._Mean          | 45 (40, 50)       | 48 (43, 57)       | 44 (34, 54)       | 52 (41, 62)       | 0.3    | 0.4    |
| LH_StrideLength_.cm._Mean          | 6.61 (6.30, 7.04) | 6.98 (6.36, 7.29) | 6.25 (5.99, 6.58) | 6.34 (6.10, 6.89) | 0.011  | 0.06   |
| StepSequence_CA_...                | 23 (14, 35)       | 23 (13, 35)       | 10 (8, 19)        | 13 (7, 19)        | 0.025  | 0.1    |
| StepSequence_CB_...                | 22 (12, 28)       | 22 (13, 34)       | 21 (7, 26)        | 14 (8, 23)        | 0.4    | 0.5    |
| StepSequence_AA_...                | 12 (5, 22)        | 11 (8, 14)        | 1 (0, 5)          | 1 (0, 6)          | <0.001 | <0.001 |
| StepSequence_AB_...                | 38 (20, 57)       | 34 (25, 48)       | 63 (53, 74)       | 65 (54, 78)       | <0.001 | <0.001 |
| Support_Zero_...                   | 0.06 (0.00, 0.64) | 0.19 (0.00, 0.49) | 0.11 (0.00, 0.17) | 0.00 (0.00, 0.12) | 0.13   | 0.2    |
| Support_Single_...                 | 13 (9, 18)        | 16 (11, 18)       | 9 (5, 15)         | 8 (6, 14)         | 0.055  | 0.13   |
| Support_Diagonal_...               | 74 (71, 78)       | 72 (69, 74)       | 69 (62, 73)       | 64 (61, 74)       | 0.01   | 0.06   |
| Support_Girdle_...                 | 3.20 (2.43, 5.02) | 3.71 (3.07, 5.22) | 5.86 (4.49, 7.14) | 6.80 (4.64, 8.98) | <0.001 | 0.006  |
| Support_Lateral_...                | 2.16 (1.47, 3.06) | 2.52 (1.61, 3.53) | 1.23 (0.76, 1.96) | 1.70 (1.33, 2.40) | 0.047  | 0.12   |
| Support_Three_...                  | 7 (5, 8)          | 4 (4, 6)          | 11 (7, 19)        | 12 (9, 15)        | <0.001 | <0.001 |
| Support_Four_...                   | 0.31 (0.10, 0.62) | 0.07 (0.00, 0.35) | 0.93 (0.18, 3.25) | 0.39 (0.11, 1.53) | 0.031  | 0.11   |
| BOS_FrontPaws_Mean_.cm.            | 1.23 (1.15, 1.31) | 1.17 (1.12, 1.26) | 1.12 (1.07, 1.24) | 1.12 (1.04, 1.16) | 0.049  | 0.12   |
| BOS_HindPaws_Mean_.cm.             | 2.22 (2.09, 2.36) | 2.21 (2.12, 2.28) | 2.21 (2.00, 2.46) | 2.16 (2.06, 2.28) | 0.7    | 0.8    |
| PrintPositions_RightPaws_Mean_.cm. | 0.72 (0.47, 0.95) | 0.52 (0.32, 0.63) | 0.58 (0.26, 0.85) | 0.43 (0.26, 0.57) | 0.12   | 0.2    |
| PrintPositions_LeftPaws_Mean_.cm.  | 0.69 (0.56, 0.92) | 0.49 (0.37, 0.63) | 0.54 (0.40, 0.85) | 0.33 (0.18, 0.48) | 0.004  | 0.035  |
